# Supplementary material for: Operational chemical weather forecasting with the ECCC online Regional Air Quality Deterministic Prediction System version 023 (RAQDPS023) – Part 1: System description
Source: Copernicus journal article supplement (doi:10.5194/egusphere-2025-4323), 2025-12-09
Supplement: Supplementary file 1 [file egusphere-2025-4323-supplement.pdf]

1 Supplement of

## 2 **Operational chemical weather forecasting with the ECCC online** 3 **Regional Air Quality Deterministic Prediction System version 023** 4 **(RAQDPS023) - Part 1: System description**

5 Michael D. Moran<sup>1\*</sup>, Verica Savic-Jovicic<sup>1</sup>, Craig A. Stroud<sup>1</sup>, Sylvain Ménard<sup>2</sup>, Wanmin Gong<sup>1</sup>, Junhua  
6 Zhang<sup>1</sup>, Qiong Zheng<sup>1</sup>, Jack Chen<sup>1</sup>, Ayodeji Akingunola<sup>1</sup>, Alexandru Lupu<sup>1</sup>, Konstantinos Menelaou<sup>2</sup>, and  
7 Rodrigo Munoz-Alpizar<sup>2</sup>

8 <sup>1</sup>Air Quality Research Division, Environment and Climate Change Canada (ECCC), Toronto, Ontario, Canada

9 <sup>2</sup>Canadian Centre for Meteorological and Environmental Prediction, ECCC, Montreal, Quebec, Canada

10 \*Retired

### 13 **S1 GEM-related meteorological components and attributes of RAQDPS023**

#### 14 **S1.1 Dynamical core**

15 The governing equations of atmospheric dynamics used by the GDPS 8.0.0, RDPS 8.0.0, and RAQDPS023 have been  
16 described by Côté et al. (1998) and Girard et al. (2014). Prognostic variables included the horizontal wind components,  
17 vertical velocity component in the hybrid  $\zeta$ -coordinate (Sect. 2.1), virtual temperature, geopotential, specific humidity,  
18 and physics-related atmospheric tracers such as cloud condensate mixing ratio and turbulent kinetic energy (TKE).  
19 GEM was configured to be hydrostatic in all three forecast systems (e.g., CMC-RDPS-8.0.0, 2021b). Time integration  
20 of this dynamical core was performed using a two-time-level, iterative-implicit, three-dimensional semi-Lagrangian  
21 scheme (Côté et al., 1998; Girard et al., 2014; Husain and Girard, 2017). This semi-implicit, semi-Lagrangian  
22 integration is unconditionally stable for any time step, thus allowing the choice of time step to be based solely on  
23 accuracy requirements (Robert, 1981; Ritchie et al., 2022). A dynamics integration time step of 450 s was used by the  
24 GDPS 8.0.0 and one of 300 s was used by both the RDPS 8.0.0 and RAQDPS023. The improved trajectory calculations  
25 for semi-Lagrangian advection described by Husain and Girard (2017) were employed, which involve trapezoidal  
26 averaging of wind components along air-parcel trajectories and cubic interpolation at the departure positions. These  
27 calculations remove numerical inconsistencies in the discretization and interpolation used for the source terms between  
28 the dynamical and trajectory equations.

29 Semi-implicit, semi-Lagrangian time integration schemes are highly efficient by virtue of circumventing the stiffness  
30 of the dynamic equations, but semi-Lagrangian advection schemes are not inherently shape-preserving or mass-  
31 conserving (e.g., Staniforth and Côté, 1991; Hansen et al., 2011; de Grandpré et al., 2016). Shape preservation for two  
32 meteorological tracers (water vapour, cloud water) was implemented in all three forecast systems using a two-step,  
33 iterative locally-mass-conserving (ILMC) monotonicity correction for tracer advection (Sørensen et al., 2013). The  
34 ILMC scheme is an *a posteriori* filter that detects the lack of shape preservation of a forecasted solution, including

35 negative concentrations, and corrects it by redistributing the overshoot or undershoot mass to the surrounding cells  
36 while preserving the mass of the forecasted solution. By imposing shape preservation, the creation of artificial local  
37 minima or maxima by the advection scheme was avoided. The Bermejo and Conde (2002) global mass fixer was then  
38 applied in the three forecast systems to impose mass conservation, where the LAM boundary-flux estimation was used  
39 for the two regional systems (Aranami et al., 2015). It is worth mentioning in this context that Staniforth and Côté  
40 (1991) observed that semi-Lagrangian advection schemes handle sharp discontinuities (e.g., clouds) better than  
41 Eulerian advection schemes and dispersion errors are localized around the discontinuity, which suggests that mass-  
42 fixing adjustments will tend to be localized as well. McTaggart-Cowan et al. (2019a) noted that the use of these two  
43 schemes in GEM improved the conservation of liquid water static energy and total water mixing ratio, with the result  
44 that total global precipitation in the GDPS was reduced by approximately 5%. A surface pressure adjustment was also  
45 made for moist-air mass conservation (McTaggart-Cowan et al., 2019a; CMC-RDPS-8.0.0, 2021b).

46 While semi-Lagrangian advection schemes have some inherent numerical diffusion (e.g., Staniforth and Côté, 1991),  
47 artificial horizontal diffusion was also implemented to damp spurious numerical noise at the shortest spatial scales  
48 (e.g., Mailhot et al., 2006). In all three systems a Del-4 operator was applied to momentum variables (10%) and a  
49 Del-6 operator (1%) was applied to potential temperature. As well, a Del-2 operator with augmented coefficients was  
50 applied to temperature and momentum variables in a sponge layer below the model lid (top six levels) (CMC-GDPS-  
51 8.0.0, 2021b; CMC-RDPS-8.0.0, 2021b).

## 52 **S1.2 Land-surface and water-surface schemes**

53 The ISBA (Interactions between Soil–Biosphere–Atmosphere) land-surface scheme was used in all three forecast  
54 systems to parameterize land surface processes and atmosphere-surface exchanges of heat and moisture (Noilhan and  
55 Planton, 1989; Bélair et al., 2003a,b). ISBA takes a mosaic approach that considers subgrid “tiles” of four major  
56 surface types: land; glacier; water; and sea ice. A GEM surface grid cell may be composed of up to four tiles to account  
57 for the presence of these different surface types. Ten prognostic variables are considered in the ISBA scheme for each  
58 land surface tile, including two surface temperature variables, three soil moisture variables, one vegetation canopy  
59 variable, and four variables describing snowpack characteristics. Each prognostic equation is solved based on an  
60 energy or water budget formulation with a force-restore term to moderate diurnal variations. Initial values of land  
61 surface temperature and moisture, deep-soil temperature and moisture, and snow depth, snow albedo and snow density  
62 were derived from analyses and then predicted using the ISBA scheme. Emissivities of bare soil and snow were derived  
63 from climatology and observations, respectively.

64 The treatment of glacier surface tiles closely followed that for land surfaces and combined a surface-energy-budget  
65 model with a two-layer force-restore term to predict glacier temperature profiles (McTaggart-Cowan et al., 2019a).  
66 Updated ice emissivities were based on observations.

67 The treatment of water surface tiles depends on the forecast system. The GDPS 8.0.0 was coupled to an ocean model  
68 whereas the RDPS 8.0.0 and RAQDPS023 obtained initial sea-surface temperatures from surface analyses and then

69 employed the one-dimensional thermodynamic mixed-layer model of Zeng and Beljaars (2005) to predict the diurnal  
70 evolution of the water skin temperature and underlying mixed-layer temperature. This two-layer scheme provides a  
71 more realistic description of diurnal variations in water surface temperature and hence surface fluxes over water. Note  
72 that the GDPS 8.0.0 also used the mixed-layer scheme over lakes as did the RDPS 8.0.0 and RAQDPS023 (McTaggart-  
73 Cowan et al., 2019a; CMC-GDPS-8.0.0, 2021b; CMC-RDPS-8.0.0, 2021b). The surface roughness length for  
74 momentum over water surfaces was based on the Charnock (1955) scheme while roughness lengths over water for heat  
75 and moisture came from Deacu et al. (2012).

76 Sea-ice (and frozen lake) surfaces were parameterized using a one-dimensional heat diffusion model (Semtner, 1976)  
77 with a simple, three-level vertical discretization (McTaggart-Cowan et al., 2019a). Initial sea-ice thickness values were  
78 derived from climatology but then evolved in time, whereas sea-ice fractions were derived from surface analyses, were  
79 fixed in time, and were checked for consistency with the sea-ice thickness. A 3% lead fraction in sea ice was assumed  
80 over salt water (McTaggart-Cowan et al., 2019a).

81 Other geophysical variables needed by the ISBA land-surface scheme include surface roughness length (except over  
82 water), surface albedo, vegetation characteristics (vegetation type and fraction, leaf area index,), soil texture and soil  
83 thermal and hydraulic coefficients, and glacier fraction. For grid cells with heterogeneous land surface cover (e.g.,  
84 some bare soil/some vegetation or some land/some water), some grid-scale geophysical fields such as roughness length,  
85 albedo, and emissivity were determined as weighted averages of tile-specific geophysical fields.

### 86 **S1.3 Surface-layer scheme**

87 Monin-Obukhov surface-layer similarity theory was used in all three forecast systems to describe turbulent surface  
88 fluxes of momentum, heat, and moisture and state variable profiles in the model surface layer, which extends from the  
89 Earth's surface to the first prognostic model level (located at approximately 10 m AGL for temperature and moisture  
90 and 20 m AGL for winds on the staggered Charney-Phillips vertical grid: Sect. 2.1). Separate profiles were calculated  
91 over each of the four surface types (tiles) and were then aggregated as a weighted average to provide a grid-cell value  
92 (McTaggart-Cowan et al., 2019a). Stability functions proposed by Delage and Girard (1992) and Beljaars and Holtslag  
93 (1991) were used for unstable and stable stratifications, respectively (CMC-GDPS-8.0.0, 2021b; CMC-RDPS-8.0.0,  
94 2021b).

95 For stable conditions the following minimum Obukhov lengths were imposed to prevent surface-atmosphere  
96 decoupling (Foken, 2006; McTaggart-Cowan et al., 2019a): 20 m over soil surfaces; 5 m over glaciers; and 10 m over  
97 water surfaces and sea ice (CMC-GDPS-8.0.0, 2021a; CMC-RDPS-8.0.0, 2021a). The higher value over land surfaces  
98 is consistent with a dependence on surface roughness (van de Wiel et al., 2007; Zheng et al., 2017).

### 99 **S1.4 Boundary-layer scheme and vertical diffusion**

100 Vertical diffusion in the planetary boundary layer (PBL) and free troposphere was described in all three forecast  
101 systems by the vertical diffusion coefficient  $K_z$ , which is parameterized using a 1.5-order turbulence closure scheme

102 based on a predictive equation for subgrid-scale (SGS) turbulent kinetic energy (Benoit et al., 1989; Bélair et al., 1999).  
103 A key parameter of the scheme is the gradient Richardson number  $Ri$ . Two turbulence length scales are also needed  
104 by this scheme. A turbulence-regime-specific mixing length  $\lambda$ , which reflects the significant eddy size, is needed to  
105 calculate both TKE and  $K_z$ , and a dissipation length scale  $\lambda_e$  is also needed to calculate TKE. The required lower  
106 boundary conditions are obtained from the surface-layer parameterization (see previous subsection).  $K_z$  from GEM  
107 was also needed by MACH (Sect. 3.1).

108 Note that a number of enhancements have been made to the original formulation of Benoit et al. (1989). First,  $\lambda$  was  
109 calculated in the GDPS 8.0.0, RDPS 8.0.0, and RAQDPS023 using a blended formulation (McTaggart-Cowan and  
110 Zadra, 2015) based on a local scheme for  $\lambda$  (Blackadar, 1962) and a non-local scheme for  $\lambda$  (Bougeault and Lacarrère,  
111 1989). A treatment for Richardson number hysteresis across the temporal transitions from stable-to-unstable conditions  
112 and unstable-to-stable conditions that uses an  $Ri$  transition zone rather than a single critical value of  $Ri$  has been  
113 implemented (McTaggart-Cowan and Zadra, 2015). A 900 s relaxation time scale was also imposed on  $\lambda$  to dampen  
114 the effects of turbulent transitions, and an upper bound of 50 m was imposed on  $\lambda_e$  (Bélair et al., 1999; McTaggart-  
115 Cowan et al., 2019a).

116 Lastly, the enhancement of turbulent diffusion near the top of the cloudy boundary layer due to updrafts, downdrafts,  
117 and related entrainment associated with boundary-layer clouds, including stratus, stratocumulus, and shallow cumulus  
118 clouds, was represented by an extension to the TKE scheme with statistical SGS cloudiness called the MoisTKE  
119 scheme (Bechtold and Siebesma, 1998; Mailhot and Bélair, 2000; Bélair et al., 2005; Mailhot et al., 2006). Three key  
120 parameters were considered: turbulent flux of total cloud water; SGS cloud fraction; and a nondimensional flux  
121 enhancement factor (Bélair et al., 2005). These cloud effects were activated only if the surface buoyancy flux was  
122 positive and the cloud layer resided below 1.5 times the PBL height (McTaggart-Cowan et al., 2019a).

123 PBL height, which is also an important quantity for air quality, was diagnosed every time step for use in the Kain-  
124 Fritsch deep convection scheme (Sect. S1.7) as well as the MoisTKE scheme. A bulk Richardson number ( $Ri_b$ ) method  
125 was used in which PBL height was determined to be the lowest momentum vertical level at which  $Ri_b$  reaches a critical  
126 value of 0.25 by scanning the  $Ri_b$  profile upward from the surface (Seidel et al., 2012; McTaggart-Cowan et al., 2019a).  
127 PBL height from GEM was also needed by MACH (Sect. 3.13).

## 128 **S1.5 Radiation scheme**

129 Solar and infrared radiation were parameterized in all three forecast systems using a correlated-k distribution technique  
130 (Li and Barker, 2005). Nine prescribed longwave bands and four shortwave bands were considered. The updated  
131 version of this scheme that is now used by GEM included an improved treatment of the water vapour continuum and  
132 solar radiation absorption by methane (McTaggart-Cowan et al., 2019a). A monthly climatological  $O_3$  distribution  
133 constructed from several data sets was used along with three-dimensional climatologies of other trace gases ( $CH_4$ ,  $NO$ ,  
134 CFC-11, CFC-12) appropriate for the year 2015 (McTaggart-Cowan et al., 2019a). A simple parameterization of

135 methane oxidation by the hydroxyl radical (OH) was also considered as a source of water vapour in the middle  
136 atmosphere (McTaggart-Cowan et al., 2019a).

137 The GEM v5.1 code includes the addition of O<sub>3</sub> as a new prognostic tracer, which made it possible for the GDPS 8.0.0  
138 to assimilate satellite O<sub>3</sub> measurements (CMC-GDPS-8.0.0, 2021a). In order to represent O<sub>3</sub> as a standalone chemical  
139 constituent (i.e., no explicit reactive chemistry), a linearized approach was used to parameterize the photochemical  
140 production and loss terms (McLinden et al., 2000). The use of this parameterization scheme, called LINOZ, in GEM  
141 has been shown to be both robust and very fast (de Grandpré et al., 2016).

## 142 **S1.6 Grid-scale cloud and precipitation scheme**

143 The Sundqvist grid-scale condensation scheme (Sundqvist et al., 1989; Pudykiewicz et al., 1992) was used in the GDPS  
144 8.0.0, RDPS 8.0.0, and RAQDPS023 to represent grid-scale cloud and precipitation processes. Four water phases were  
145 considered: water vapour; cloud water; rain water; and snow water. One modification to the original scheme was to  
146 use an updated cloud-to-precipitable water autoconversion rate (McTaggart-Cowan et al., 2019a; CMC-GDPS-8.0.0,  
147 2021b; CMC-RDPS-8.0.0, 2021b). Lastly, this grid-scale cloud scheme was coupled to the three SGS cloud schemes  
148 described next via the liquid and solid condensate mass detrained from convective updrafts in these cumulus  
149 parameterization schemes, which were added to the grid-scale condensate mass (McTaggart-Cowan et al., 2019a).

## 150 **S1.7 Cumulus parameterization schemes**

151 Three separate cumulus parameterization schemes were used in the GDPS 8.0.0, RDPS 8.0.0, and RAQDPS023 to  
152 represent three different modes of SGS unstable moist vertical motions, namely deep convection, shallow convection,  
153 and mid-level convection. The term “deep convection” denotes convective clouds connected to the PBL with depths  
154 of at least 3 km; the term “shallow convection” refers to the subset of convective clouds whose bases are located in the  
155 PBL but which have updraft depths between 0.5 and 3 km that penetrate the PBL capping inversion (thus distinguishing  
156 them from the boundary-layer clouds parameterized in the MoisTKE scheme described in Sect. S1.4); and the term  
157 “mid-level convection” (or elevated convection) refers to convective clouds whose bases are located above the PBL.  
158 All three schemes are formulated to transport momentum as well as heat and moisture vertically. Each scheme is mass-  
159 flux-based, and their implementations share five important structural elements: trigger; updraft; downdraft; solver; and  
160 closure (McTaggart-Cowan et al., 2019a). Calculations were performed sequentially for these three schemes, starting  
161 with the deep convection scheme and finishing with the mid-level convection scheme.

162 For SGS deep convection a modified version of the Kain–Fritsch deep-convection scheme (Kain and Fritsch, 1990,  
163 1992) was used, which has been designed for horizontal grid spacing approaching the “gray zone” over which deep  
164 convection is partially resolved (i.e., horizontal grid spacing on the order of 1–10 km). The modifications included a  
165 Lagrangian treatment of convective initiation, object-based clouds, and a vertical transfer of momentum. See  
166 McTaggart-Cowan et al. (2019a) for a summary and McTaggart-Cowan et al. (2019b) for a detailed description of  
167 these modifications. Note that the trigger-function parameters are sensitive to horizontal grid spacing, so different

168 values were specified for the GDPS 8.0.0 versus the RDPS 8.0.0 and RAQDPS023 (see Table 2 of McTaggart-Cowan  
169 et al., 2019a).

170 SGS shallow convection was represented with a mass-flux scheme based on Bechtold et al. (2001). Simple  
171 representations of cloud entrainment (Siebesma et al., 2003) and constant fractional detrainment (Siebesma and  
172 Cuijpers, 1995) were used in the GEM implementation along with a simple, non-iterative closure that assumes that the  
173 shallow convective clouds in a grid cell are in a state of quasi-equilibrium with boundary-layer forcing (Bechtold et  
174 al., 2014). Note that downdrafts and precipitation were not parameterized by this scheme.

175 Lastly, SGS mid-level convection was treated using components of the deep convection scheme if certain conditions  
176 were met (McTaggart-Cowan et al., 2019a). One condition was that a minimum upward grid-scale mass flux was  
177 present: the required threshold was higher for the GDPS 8.0.0 than the RDPS 8.0.0 / RAQDPS023 ( $1 \times 10^7 \text{ kg s}^{-1}$  vs.  
178  $7 \times 10^6 \text{ kg s}^{-1}$ ). Another condition was that there must be a layer at least 500 m AGL that can build a cloud at least 2 km  
179 thick after the layer is raised to its lifting condensation level. Note that the deep and shallow convection schemes  
180 would not be activated in a low convective-available-potential-energy (CAPE) environment, but the mid-level  
181 convection scheme could be triggered even in low-CAPE environments.

## 182 **S1.8 Gravity wave drag and low-level orographic blocking schemes**

183 SGS orography is associated with two processes that must be parameterized: (i) vertical momentum transport due to  
184 the breaking of mountain-induced gravity waves (“mountain wave drag”) and (ii) blocking of low-level upstream flows  
185 by mountain barriers. Parameterizations due to McFarlane (1987) for mountain wave drag and Lott and Miller (1997)  
186 for low-level blocking (with an enhanced drag coefficient: Wells et al., 2008; Vosper et al., 2009) were used by all  
187 three forecast systems (McTaggart-Cowan et al., 2019a; CMC-GDPS-8.0.0, 2021b; CMC-RDPS-8.0.0, 2021b). In  
188 addition, the Hines (1997a,b) Doppler spread parametrization for non-orographic gravity-wave drag due to imbalances  
189 and geostrophic adjustment associated with a variety of transient mesoscale meteorological features was also used to  
190 simulate the upper-level circulation accurately (Charron et al., 2002; McTaggart-Cowan et al., 2019a; CMC-GDPS-  
191 8.0.0, 2021b; CMC-RDPS-8.0.0, 2021b)

192 The geophysical variables required by these schemes include gridded orography plus SGS orographic parameters for  
193 gravity wave drag and low-level blocking. Note that it is a standard procedure to apply a smoothing operator to the  
194 model orography field in order to minimize stationary noise generation due to small-scale resolved orographic features.  
195 A numerical filter with a wavelength cutoff at  $3\Delta x$  for the GDPS 8.0.0 and  $5\Delta x$  for the RDPS 8.0.0 and RAQDPS023  
196 was applied. SGS orographic parameters were computed using an analytically-extended reference orography spectrum  
197 and a 5 km cut-off for horizontal terrain scales (Beljaars et al., 2004; McTaggart-Cowan et al., 2019a; CMC-GDPS-  
198 8.0.0, 2021b; CMC-RDPS-8.0.0, 2021b).

## 199 **S2 Overview of anthropogenic national emissions inventories pre-processing and processing**

200 A number of adjustments had to be made to the projected national emissions inventories before they underwent the  
201 processing required to create the SET4.0.0 emissions input files. For the projected 2020 Canadian Air Pollutant  
202 Emissions Inventory (APEI), emissions from two emissions sectors, prescribed burning and agricultural-land wind  
203 erosion, were removed from the inventory because of insufficient information to allocate these emissions to specific  
204 days of the year or times of day. Projected 2020 aircraft in-flight cruise emissions were also removed because they  
205 would not materially affect short-term surface pollutant concentrations due to the altitude (6-10 km above sea level) at  
206 which they were emitted, whereas projected 2020 aircraft landing and takeoff emissions were kept. Projected 2020  
207 residential wood combustion (RWC) emission values were replaced by 2010 APEI values due to concerns over some  
208 aspects of the revised estimation methodology used to calculate RWC emissions for the 2015 APEI (ECCC, 2013,  
209 2016). In addition, projected 2020 emission values for one power plant and one large industrial facility that had been  
210 active in 2015 but that were known to have closed by 2020 were removed from the major-point-source emissions file  
211 (Moran et al., 2021).

212 Adjustments were also made to Canadian projected 2020 fugitive dust emissions from paved and unpaved roads and  
213 from construction activities. Fugitive dust emissions are the largest component of anthropogenic PM<sub>2.5</sub> and PM<sub>10</sub>  
214 emissions, of which the main contributing emission sectors are vehicular traffic on paved and unpaved road surfaces  
215 and agricultural and construction activities. Emissions estimation methodologies are always subject to re-evaluation  
216 and improvement, and a new methodology to estimate fugitive dust emissions from paved and unpaved road surfaces  
217 was introduced by ECCC in 2020 for the 2018 APEI (ECCC, 2020). In order to account for these methodological  
218 changes in the projected 2020 APEI, whose base 2015 fugitive road dust emissions had been calculated using an older  
219 methodology (ECCC, 2016), the paved-road fugitive dust emissions from the projected 2020 inventory for each  
220 province and territory were scaled by a factor of 0.15 (i.e., decreased by 85%) and unpaved-road fugitive dust emissions  
221 were scaled by a factor of 1.11 (i.e., increased by 11%).

222 One useful check on any Canadian CAC annual emissions inventory is to compare per capita Canadian and U.S.  
223 emissions for the same emissions source sectors for the same year or closest year (since U.S. National Emissions  
224 Inventories (NEIs) are only available every three years). Given that differences in population have been controlled for  
225 by considering per capita values, one expects the per capita emissions values to be broadly similar given socioeconomic  
226 and emission control similarities between the two countries. When this comparison was made for the scaled 2015  
227 Canadian fugitive dust emissions from paved and unpaved road surfaces and from agricultural activities and residential  
228 construction, the agreement with the closest U.S. CAC inventory, the 2014 U.S. NEI (<https://www.epa.gov/air-emissions-inventories/2014-national-emissions-inventory-nei-data>), was reasonable. For 2015 fugitive dust emissions  
229 from heavy construction, however, per capita Canadian emissions were 40 times higher than 2014 per capita U.S.  
230 emissions. Moreover, the estimation methodology used to estimate 2015 Canadian heavy construction emissions had  
231 not changed since 2012 and heavy construction emissions in the APEI had been held constant since 2013, which  
232 suggested a high level of uncertainty for these emissions. It was thus decided to scale Canadian projected 2020 fugitive  
233

234 dust emissions for heavy construction by a factor of 0.05 so that 2015 per capita Canadian emissions from this sector  
235 would be within a factor of two of the 2014 per capita U.S. emissions.

236 The Canadian projected 2020 APEI then underwent two final preparatory steps by ECCC before the emissions  
237 processing step. First, the point source file was separated into two files, a major-point-source file and a minor-point-  
238 source file, where a 20-m stack height threshold was applied to assign individual point sources to the major- or minor-  
239 point-source files based on stack height. Similarly, the area source file was separated by emissions source type into  
240 multiple files, including on-road mobile sources, off-road mobile sources, marine sources, agricultural sources, other  
241 fugitive dust area sources, and other non-fugitive-dust area sources. This separation by source type made it possible  
242 to apply special treatments such as meteorological modulation to an emissions subset (Sect. 3.12) and also to perform  
243 quality-control checks more easily after the emissions processing step. The second final preparatory step was to convert  
244 the Canadian projected 2020 APEI into a different format that would be readable by the emissions processing system.  
245 This step included augmentation of the APEI to include some non-standard data such as point source stack  
246 characteristics (Sect. 3.13) and facility operating schedules (e.g., Sassi et al., 2021).

247 Several minor adjustments were also required to the projected 2023 U.S. NEI for emissions from commercial marine  
248 vessels. These emissions had been pre-processed by the U.S. EPA for three non-overlapping modelling grids used by  
249 the EPA: (i) emissions within U.S. federal waters for the continental U.S. on a 12-km horizontal grid; (ii) emissions  
250 for Alaska on a 9-km grid; and (iii) emissions for other Pacific and Atlantic Ocean areas on a 4-km grid. However,  
251 there were spatial gaps among these three emissions regions, which were filled by inserting emissions from another  
252 marine emissions data set that was used for Phase 4 of the Air Quality Model International Initiative (AQMEII-4)  
253 project (Galmarini et al., 2021). The projected 2023 U.S. inventory also contained marine emissions over some  
254 Canadian waters: these emissions were removed to avoid double counting with the Canadian inventory. Note that the  
255 EPA had created an emissions-processing version of the projected 2023 U.S. NEI and had also separated the surface  
256 emissions into multiple files by source type for easier processing and tracking (U.S. EPA, 2019).

## 257 **S2.1 Emissions processing**

258 Once the above inventory adjustments had been made, the three projected national inventories were processed using  
259 version 4.7 of the SMOKE (Sparse Matrix Operation Kernel Estimation) emissions processing system software (see  
260 <https://www.emascenter.org/smoke/>) to generate the SET4.0.0 set of major-point-source emissions files and gridded  
261 surface emissions files. Two types of emissions files were needed because the separate major-point-source files  
262 contained emissions for large individual sources such as power plants and smelters for which plume rise was calculated  
263 by GEM-MACH (Sect. 3.13), whereas the surface emissions were the sum of area sources, on-road mobile sources,  
264 off-road mobile sources, and minor point sources for which plume rise was not relevant. Note that there were also two  
265 types of surface emissions identified in the SET4.0.0 set, one type identifying fugitive-dust area emissions and the  
266 other type identifying all other surface emissions. This made it possible to apply meteorological modulation only to  
267 fugitive-dust area emissions (cf. Sect. 3.12).

268 The SMOKE emissions processing system must perform four major processing tasks: (i) temporal allocation, where  
269 annual/monthly inventory emissions were allocated to specific hours of specific days and months of the year based on  
270 a set of source-sector-specific monthly, day-of-the-week (DOW), and diurnal temporal profiles; (ii) spatial allocation,  
271 where emissions reported by jurisdiction such as a province or county were allocated to the group of model grid cells  
272 that overlay that jurisdiction in as realistic a pattern as possible using source-sector-specific gridded spatial surrogate  
273 fields; (iii) chemical speciation, where four of the CACs contained in the inventories ( $\text{NO}_x$ , VOC,  $\text{PM}_{2.5}$ ,  $\text{PM}_{10}$ ) were  
274 separated into more detailed model species using source-sector-specific speciation profiles; and (iv)  $\text{PM}_x$  size  
275 disaggregation ( $x = 2.5$  or  $10$ ), where  $\text{PM}_x$  emissions from the inventory were allocated to different model PM size  
276 sections or modes using source-sector-specific PM size distribution profiles (e.g., Dickson and Oliver, 1991; Houyoux  
277 et al., 2000; Moran et al., 2013; Matthias et al., 2018; Zhang et al., 2018; Boutzis et al., 2020).

278 Each SET4.0.0 emissions file generated by SMOKE was specific to a particular day of the week and month of the year,  
279 and each file contained 24 hours of gridded emission fields of model species (where  $\text{NO}_x$  emissions were split into  
280 emissions of NO,  $\text{NO}_2$ , and HONO,  $\text{PM}_{2.5}$  and  $\text{PM}_{10}$  emissions were each split into emissions of six model PM chemical  
281 components, and VOC emissions were split into emissions of 11 model lumped VOC species for the ADOM-2 gas-  
282 phase chemistry mechanism) (Stroud et al., 2008; Zhang et al., 2018; see Table 3).

283 For the first emissions processing task, temporal allocation, SMOKE used 82 monthly temporal profiles, 22 DOW  
284 profiles, and 29 diurnal profiles to process the Canadian emissions, 9,971 monthly profiles, 12 DOW profiles, and 95  
285 diurnal profiles to process the U.S. emissions, and 161 monthly profiles, 15 DOW profiles, and 49 diurnal profiles to  
286 process the Mexican emissions (CMC-RAQDPS-023, 2021). For the second task, spatial allocation, SMOKE  
287 employed 55 source-sector-specific gridded spatial surrogate fields to allocate emissions for each Canadian province  
288 or territory to one or more grid cells on the RAQDPS023 10-km continental Yin grid (Fig. 2), 42 gridded spatial  
289 surrogate fields for each U.S. county, and 15 gridded spatial surrogate fields for each Mexican county (CMC-RAQDPS-  
290 023, 2021). The gridded surface emissions from these different jurisdictions and source types were then summed for  
291 each model grid cell. Major-point-source emissions, on the other hand, were assigned to a single model grid cell based  
292 on their latitude-longitude coordinates while remaining in separate records for subsequent plume-rise calculations  
293 (Sect. 3.13). For the third task, chemical speciation, SMOKE used 331 VOC and 85 PM speciation profiles from the  
294 U.S. EPA's SPECIATE 4.5 database (<https://www.epa.gov/air-emissions-modeling/speciate-1>; Reff et al., 2009;  
295 Simon et al., 2010). Only two speciation profiles were used to speciate  $\text{NO}_x$  emissions: one profile for on-road and  
296 off-road sources, which included a small HONO component as well as NO and  $\text{NO}_2$  components, and a generic profile  
297 with only NO and  $\text{NO}_2$  components for point and area sources. Lastly, the fourth task, PM size disaggregation, was  
298 handled simply by assigning  $\text{PM}_{2.5}$  emissions to the first RAQDPS023 PM size bin and assigning  $\text{PM}_{cf}$  emissions,  
299 calculated as the difference between  $\text{PM}_{10}$  and  $\text{PM}_{2.5}$  emissions, to the second RAQDPS023 PM size bin. Following  
300 the chemical speciation and PM size disaggregation steps the SET4.0.0 output files produced by SMOKE contained  
301 hourly gridded emission fields of 18 gases and 12 particle size bin/chemical components for a total of 30 emitted model

302 species: SO<sub>2</sub>, (H<sub>2</sub>)SO<sub>4</sub>, NO, NO<sub>2</sub>, HONO, CO, C<sub>3</sub>H<sub>8</sub>, ALKA, ETHE, ALKE, TOLU, AROM, HCHO, ALD<sub>2</sub>, MEK,  
303 CRES, ISOP, NH<sub>3</sub>, SU<sub>1</sub>, SU<sub>2</sub>, NI<sub>1</sub>, NI<sub>2</sub>, AM<sub>1</sub>, AM<sub>2</sub>, EC<sub>1</sub>, EC<sub>2</sub>, PC<sub>1</sub>, PC<sub>2</sub>, CM<sub>1</sub>, and CM<sub>2</sub>.

304 It should be noted that two more adjustments were made to all fugitive dust emissions *after* SMOKE processing. One  
305 adjustment was done immediately as a (static) post-processing step, where a transportable-fraction (TF) scaling factor  
306 field was applied to account for “home-grid-cell” SGS particle settling and particle removal by interception and  
307 impaction by vegetation (e.g., Pace, 2005). The TF scaling factor ranged between 0 and 1 and was dependent on the  
308 fractional coverage of different land-use classes in each grid cell, where forest classes had a TF value of zero and  
309 agricultural classes had a value of 0.75. As described in Sect. 3.12 the other (dynamic) adjustment was to apply  
310 meteorological modulation at each chemistry time step during each RAQDPS023 simulation to account for the day-  
311 specific dampening effects of precipitation and snow cover on fugitive dust emissions. In order to accommodate the  
312 model calculations required for meteorological modulation and plume rise (Sects. 3.12 and 3.13), three sets of  
313 emissions fields must be read by the RAQDPS023 each hour from two separate day-specific files: (i) major-point  
314 source emissions; and (ii) surface emissions files consisting of fugitive dust emissions (type F) and other surface  
315 emissions (type E). SET4.0.0 thus consisted of two input files per day of a typical week of each month, or 168 files in  
316 total. More information related to the SMOKE processing required to create GEM-MACH emissions files may be  
317 found in Zhang et al. (2018) and Sassi et al. (2021).

### 318 **S3 Description of Canadian Forest Fire Emissions Prediction System (CFFEPS) version 4.1**

319 CFFEPS v4.1 consists of a fire-growth module, a fire emissions module, and a thermodynamic-based module to  
320 estimate the vertical penetration height of a smoke plume (Chen et al., 2019a,b). Outputs from the Canadian Wildland  
321 Fire Information System (CWFIS), which is an operational product developed and managed by the Canadian Forest  
322 Service (CFS), underpin the CFFEPS fire-growth module. The CWFIS is itself composed of three major subsystems:  
323 (i) the Canadian Forest Fire Weather Index (FWI) subsystem, which accounts for the influence of four surface weather  
324 elements (dry-bulb temperature, relative humidity, wind speed, and 24 hour accumulated precipitation) on the relative  
325 risk for wildfire occurrence; (ii) the Fire Monitoring, Mapping, and Modeling (Fire M3) subsystem, which identifies  
326 and locates active fires (“hotspots”) using NRT satellite imagery; and (iii) the Canadian Forest Fire Behaviour  
327 Prediction (FBP) subsystem, which estimates fire fuel consumption and fire intensity  
328 (<https://cwfis.cfs.nrcan.gc.ca/home>).

329 Input data needed by the FWI subsystem include observing station measurements of 2 m dry-bulb temperature and  
330 relative humidity, 2 m dew point, 10 m wind speed, surface pressure, and past 24 hour rainfall from about 2500  
331 Canadian and U.S. weather stations plus 72 hour ECCC weather forecasts for the same station locations. The six  
332 primary outputs of the FWI subsystem are numerical moisture codes for the forest-floor fine-fuel layer (i.e., leaf litter,  
333 needles, cured grass, small twigs; 1.2 cm deep), duff layer (layer of partially/fully decomposed organic materials  
334 beneath the fine-fuel layer; 7 cm deep), and deep duff layer (beneath the duff layer; ~18 cm deep), an initial spread

335 index (a function of surface wind speed and fine-fuel moisture content), total subsurface fuel available for combustion,  
336 and a combined FWI numerical value (Van Wagner, 1987; <https://cwfis.cfs.nrcan.gc.ca/background/summary/fwi>).

337 As of 2021 the fire hotspot data needed by the Fire M3 subsystem are obtained from the 4- $\mu\text{m}$  and 11-  $\mu\text{m}$  infrared  
338 channel imagery of two radiometer instruments carried on four U.S. polar-orbiting satellites: (i) the Moderate  
339 Resolution Imaging Spectroradiometer (MODIS) on two NASA satellites; and (ii) the Visible Infrared Imaging  
340 Radiometer Suite (VIIRS) on two more NASA satellites (<https://cwfis.cfs.nrcan.gc.ca/background/dsm/fm3>). One to  
341 two retrievals covering all of Canada, including remote areas, are available from each satellite each day. However,  
342 hotspot detection may not be possible due to cloud or thick smoke obscuration of the surface or if fire size or intensity  
343 is small, so not every fire, even large fires, will be detected every day. In addition, internal data filtering and  
344 measurements at other wavelengths are applied to remove false positives (e.g., industrial sources, roofs of large  
345 buildings, cloud edges). To support ECCC the CFS has extended CWFIS capabilities to provide fire hotspots over the  
346 U.S. as well as Canada throughout the year instead of just the May to September period, which historically was the  
347 typical wildfire season in Canada. Note that the satellite measurements have a time lag or latency between one and  
348 seven hours due to the time required for image acquisition and distribution, hence the NRT descriptor.

349 The third major CWFIS component is the FBP subsystem, which uses FWI system outputs together with fuel type and  
350 topography to predict fire rate of spread (ROS;  $\text{m min}^{-1}$ ), fire intensity ( $\text{kW m}^{-1}$ ), crown fraction burned and fire type  
351 (crown fire or surface fire), and total fuel consumption ( $\text{kg dry biomass m}^{-2}$ ) at hotspot locations  
352 (<https://cwfis.cfs.nrcan.gc.ca/background/summary/fbp>). Sixteen fuel types such as Boreal Spruce and Ponderosa  
353 Pine–Douglas Fir are considered (e.g., <https://cwfis.cfs.nrcan.gc.ca/background/fueltypes/c2>).

### 354 **S3.1 Forest fire emission forecasts**

355 CFFEPS v4.1 includes the source code for the FWI and FBP subsystems, which allows meteorological forecast fields  
356 from GEM to be considered for every hour and not just for noontime as in the CFS operational version of the CWFIS.  
357 Hourly biomass burning (BB) emissions are then estimated in CFFEPS v4.1 using a bottom-up, process-based  
358 approach, where emissions per fire (or hotspot) per day are the product of estimated burn area per hotspot, estimated  
359 fuel consumption per unit area, and emission factors for different chemical species and combustion stages (Chen et al.,  
360 2019a,b). Hotspot and associated fuel type information for the previous 24 hours is provided by the CWFIS Fire M3  
361 subsystem. Initial daily burn area per hotspot is a prescribed value by province and fuel type that is updated periodically  
362 by CFS based on their analysis of CWFIS historical averages of reported burn areas by eco-region and fuel type; it is  
363 assumed to remain constant for each day of the forecast (i.e., persistence). Fuel consumption values are estimated by  
364 fuel type via the FBP subsystem driven with forecast meteorology. The incorporation of the FBP subsystem allows  
365 CFFEPS v4.1 to account for spatially variable biomass/fuel inputs using forest composition data from Canada's  
366 National Forest Inventory (Beaudoin et al., 2014, 2018) (Chen and Menelaou, 2021).

367 To calculate fire emissions, CFFEPS v4.1 uses FBP fuel combustion estimates to account for emissions from three  
368 combustion stages: flaming, smoldering, and residual combustion (Chen et al., 2019b). A look-up table is used to

369 allocate fuel consumption between these different stages (Table 2 of Chen et al., 2019b), which have different burn  
370 durations: 15 minutes for flaming followed by several hours for smoldering and several hours for residual combustion,  
371 depending on the thickness of the forest-floor organic duff layer (Chen et al., 2019b). Different emission factors, which  
372 are constant parameters representing grams of emissions per kilogram of fuel consumed, are applied to estimate  
373 emissions from a wildfire for each combustion stage for eight chemical species: CO, CH<sub>4</sub>, NO<sub>x</sub>, NH<sub>3</sub>, SO<sub>2</sub>, non-  
374 methane hydrocarbons (NMHC), PM<sub>2.5</sub>, and PM<sub>10</sub> (Table 3 of Chen et al., 2019b). Chemical speciation is further  
375 applied for NMHC emissions (cf. Sect. S2) to calculate ADOM-2 VOC species emissions using the U.S. EPA  
376 SPECIATEv4.5 speciation profiles for flaming (#95425) and smoldering and residual combustion (#95428)  
377 (<https://www.epa.gov/air-emissions-modeling/speciate-1>; Chen et al., 2019a). Similarly, PM<sub>2.5</sub> and PM<sub>10</sub> emissions  
378 from CFFEPS are subdivided into six PM chemical components with the following EPA SPECIATEv4.5 wildfire PM  
379 speciation profile: POM (78.5%), EC (9.5%), CM (9.7%), SU (1.3%), NI (0.1%), and AM (0.9%) (Chen et al., 2019a).

380 Fire emission forecasts were calculated by CFFEPS v4.1 prior to each RAQDPS-FW023 forecast simulation using the  
381 latest hotspot information for the past 24 hours from the operational CFS version of CWFIS. To obtain 72 hour  
382 forecasts of hourly BB emission values, current hotspots were assumed to persist for the next 72 hours and hourly  
383 changes in biomass fuel consumption were parameterized for a 24-hour period based on burn duration for the three  
384 combustion stages, fire ROS, and the average diurnal variation of the moisture content of the forest-floor litter layer,  
385 which increases as moisture content decreases (Chen et al., 2019b).

386 In the previous version of CFFEPS, v2.06, the diurnal distribution of daily burn area, which is used to allocate daily to  
387 hourly emissions, was estimated by a fixed weighted-normalization approach using a predefined diurnal profile, with  
388 peak fire growth at 16:00 local standard time (LST) and minimal near constant growth between 0:00 to 8:00 LST (Chen  
389 et al., 2019b). In CFFEPS v4.1, however, the diurnal distribution of daily burn area was determined based on a  
390 weighted moving average of the ratio of hourly fire ROS as estimated by the FBP subsystem to the sum of hourly ROS  
391 values for the previous 24 hours (Chen and Menelaou, 2021). This new scheme should be more realistic as it is based  
392 on hourly forecast meteorology rather than a static temporal profile.

### 393 **S3.2 Plume rise**

394 Plume-rise schemes for smokestacks like the Briggs (1984) scheme (cf. Sect. 3.13) have also been used to estimate  
395 wildfire plume rise, but wildland fires are much broader than smokestacks and they lack any initial vertical velocity;  
396 instead, they generate their own buoyant plume. CFFEPS v4.1 uses an alternate thermodynamic approach described  
397 by Anderson et al. (2011) to parameterize wildfire plume rise. Hourly plume injection height is estimated based on a  
398 fire energy balance such that the buoyancy of a smoke plume is thermodynamically balanced with the forecast vertical  
399 temperature profile of the atmospheric column above the fire while accounting for fuel moisture evaporation and  
400 condensation.

401 In earlier versions of CFFEPS, the plume-rise scheme was based on lifting the smoke plume dry adiabatically at a  
402 constant rate at hotspot locations and then equilibrating the buoyant plume with the local environmental lapse rate

403 derived from a simplified vertical temperature profile determined by temperatures on five pressure levels: surface, 850,  
404 700, 500, and 250 hPa (Chen et al., 2019b). CFFEPS v4.1 instead uses the higher-resolution forecast vertical  
405 temperature profiles that are available on the RAQDPS-FW023 84-layer vertical grid (Sect. 2.1). The thermodynamic  
406 calculation of plume heat flux in CFFEPS v4.1 was also updated to account for the heat lost due to the latent heat of  
407 evaporation of fuel moisture during combustion. At the same time, as the plume passes the atmospheric lifting  
408 condensation level, the latent heat of condensation of plume water vapour is added to the energy of the plume aloft to  
409 obtain the final injection height within the atmospheric column. These detailed physical processes are considered  
410 hourly for each hotspot as the fire thermal energy and the atmospheric vertical temperature profile change, and the final  
411 hourly plume injection height is used to prescribe the vertical distribution of emissions within the column below the  
412 plume injection height (Chen et al., 2019b; Chen and Menelaou, 2021).

### 413 **S3.3 Outputs and file structure**

414 CFFEPS v4.1 outputs are saved in one file similar in format to the anthropogenic major-point-source emissions input  
415 file. The outputs are estimated hourly plume injection height (ZPLM meters) and hourly speciated emissions ( $\text{g s}^{-1}$ )  
416 over the 72-hour forecast period at each hotspot location as specified by latitude/longitude. There are 21 ADOM-2  
417 gas- and 12 particle-phase emitted species that are output (identified by a leading “E”): ECO, ECO2, ENO, ENO2,  
418 ENH3, ESO2, ESO4, EA2, EA3, EALD, EARO, EC38, ECRE, EETH, EHCH, EISO, EMEK, ETOL, EOTH, EC1,  
419 EC2, EAM1, EAM2, ECM1, ECM2, EEC1, EEC2, ENI1, ENI2, EPC1, EPC2, ESU1, and ESU2 (cf. Table 3). Note  
420 that ECO2, EC1 (methane), and EC2 (ethane) are not needed by the ADOM-2 gas-phase chemistry mechanism but  
421 may be used in other chemistry parameterizations. This BB emissions file was input directly to the RAQDPS-FW023,  
422 which then allocated the emissions to model surface and elevated grid cells.

### 423 **S3.4 Limitations**

424 CFFEPS v4.1 has a number of limitations that should be kept in mind (Chen et al., 2019a). First, as already noted  
425 above some fires may not be detected due to (i) their small size, (ii) their initiation after the last available satellite  
426 overpass, or (iii) the presence of thick cloud or heavy smoke above the fire. Second, detected fires are assumed to  
427 continue burning but to remain the same size over the duration of the forecast. Third, fire emissions are treated as point  
428 sources and hence are assigned to a single grid cell. And fourth, wildfire combustion heat and emitted smoke are  
429 assumed not to affect meteorological fields, which may not be a good assumption for large, intense fires.

430

### 431 **Supplement References**

432 Anderson, K., Pankratz, A., and Mooney, C.: A thermodynamic approach to estimating smoke plume heights, in: Proc. Ninth  
433 Symposium on Fire and Forest Meteorology, Oct. 17-20, Palm Springs, California, 8 pp.,  
434 <https://ams.confex.com/ams/9FIRE/webprogram/Manuscript/Paper192294/FFM9 - Smoke - final.pdf>, 2011.

435 Aranami, K., Davies, T., and Wood, N.: A mass restoration scheme for limited-area models with semi-Lagrangian advection, Q.  
436 J. R. Meteorol. Soc., 141, 1795–1803, <https://doi.org/10.1002/qj.2482>, 2015.

- 437 Beaudoin, A., Bernier, P. Y., Guindon, L., Villemaire, P., Guo, X. J., Stinson, G., Bergeron, T., Magnussen, S., and Hall, R. J.:  
 438 Mapping attributes of Canada's forests at moderate resolution through  $k$ NN and MODIS imagery, *Can. J. For. Res.*, 44, 521–532,  
 439 <https://doi.org/10.1139/cjfr-2013-0401>, 2014.
- 440 Beaudoin, A., Bernier, P. Y., Villemaire, P., Guindon, L., and Guo, X. J.: Tracking forest attributes across Canada between 2001  
 441 and 2011 using a  $k$  nearest neighbors mapping approach applied to MODIS imagery, *Can. J. For. Res.*, 48, 85–93,  
 442 <https://doi.org/10.1139/cjfr-2017-0184>, 2018.
- 443 Bechtold, P. and Siebesma, P.: Organization and representation of boundary layer clouds, *J. Atmospheric Sci.*, 55, 888–895,  
 444 [https://doi.org/10.1175/1520-0469\(1998\)055<0888:OAROBL>2.0.CO;2](https://doi.org/10.1175/1520-0469(1998)055<0888:OAROBL>2.0.CO;2), 1998.
- 445 Bechtold, P., Bazile, E., Guichard, F., Mascart, P., and Richard, E.: A mass-flux convection scheme for regional and global models,  
 446 *Q. J. R. Meteorol. Soc.*, 127, 869–886, <https://doi.org/10.1002/qj.49712757309>, 2001.
- 447 Bechtold, P., Semane, N., Lopez, P., Chaboureau, J.-P., Beljaars, A., and Bormann, N.: Representing equilibrium and  
 448 nonequilibrium convection in large-scale models, *J. Atmospheric Sci.*, 71, 734–753, <https://doi.org/10.1175/JAS-D-13-0163.1>,  
 449 2014.
- 450 Bélair, S., Mailhot, J., Strapp, J. W., and MacPherson, J. I.: An examination of local versus nonlocal aspects of a TKE-based  
 451 boundary layer scheme in clear convective conditions, *J. Appl. Meteorol.*, 38, 1499–1518, [https://doi.org/10.1175/1520-0450\(1999\)038<1499:AEOLVN>2.0.CO;2](https://doi.org/10.1175/1520-0450(1999)038<1499:AEOLVN>2.0.CO;2), 1999.
- 453 Bélair, S., Crevier, L.-P., Mailhot, J., Bilodeau, B., and Delage, Y.: Operational implementation of the ISBA land surface scheme  
 454 in the Canadian regional weather forecast model. Part I: Warm season results, *J. Hydrometeorol.*, 4, 352–370,  
 455 [https://doi.org/10.1175/1525-7541\(2003\)4<352:OIOTIL>2.0.CO;2](https://doi.org/10.1175/1525-7541(2003)4<352:OIOTIL>2.0.CO;2), 2003a.
- 456 Bélair, S., Brown, R., Mailhot, J., Bilodeau, B., and Crevier, L.-P.: Operational implementation of the ISBA land surface scheme  
 457 in the Canadian regional weather forecast model. Part II: Cold season results, *J. Hydrometeorol.*, 4, 371–386,  
 458 [https://doi.org/10.1175/1525-7541\(2003\)4<371:OIOTIL>2.0.CO;2](https://doi.org/10.1175/1525-7541(2003)4<371:OIOTIL>2.0.CO;2), 2003b.
- 459 Bélair, S., Mailhot, J., Girard, C., and Vaillancourt, P.: Boundary layer and shallow cumulus clouds in a medium-range forecast of  
 460 a large-scale weather system, *Mon. Weather Rev.*, 133, 1938–1960, <https://doi.org/10.1175/MWR2958.1>, 2005.
- 461 Beljaars, A. C. M. and Holtslag, A. A. M.: Flux parameterization over land surfaces for atmospheric models, *J. Appl. Meteorol.*,  
 462 30, 327–341, [https://doi.org/10.1175/1520-0450\(1991\)030<0327:FPOLSF>2.0.CO;2](https://doi.org/10.1175/1520-0450(1991)030<0327:FPOLSF>2.0.CO;2), 1991.
- 463 Beljaars, A. C. M., Brown, A. R., and Wood, N.: A new parametrization of turbulent orographic form drag, *Q. J. R. Meteorol.*  
 464 *Soc.*, 130, 1327–1347, <https://doi.org/10.1256/qj.03.73>, 2004.
- 465 Benoit, R., Côté, J., and Mailhot, J.: Inclusion of a TKE boundary layer parameterization in the Canadian Regional Finite-Element  
 466 Model, *Mon. Weather Rev.*, 117, 1726–1750, [https://doi.org/10.1175/1520-0493\(1989\)117<1726:IOATBL>2.0.CO;2](https://doi.org/10.1175/1520-0493(1989)117<1726:IOATBL>2.0.CO;2), 1989.
- 467 Bermejo, R. and Conde, J.: A conservative quasi-monotone semi-Lagrangian scheme, *Mon. Weather Rev.*, 130, 423–430,  
 468 [https://doi.org/10.1175/1520-0493\(2002\)130<0423:ACQMSL>2.0.CO;2](https://doi.org/10.1175/1520-0493(2002)130<0423:ACQMSL>2.0.CO;2), 2002.
- 469 Blackadar, A. K.: The vertical distribution of wind and turbulent exchange in a neutral atmosphere, *J. Geophys. Res.*, 67, 3095–  
 470 3102, <https://doi.org/10.1029/JZ067i008p03095>, 1962.
- 471 Bougeault, P. and Lacarrere, P.: Parameterization of orography-induced turbulence in a mesobeta--scale model, *Mon. Weather*  
 472 *Rev.*, 117, 1872–1890, [https://doi.org/10.1175/1520-0493\(1989\)117<1872:POOITI>2.0.CO;2](https://doi.org/10.1175/1520-0493(1989)117<1872:POOITI>2.0.CO;2), 1989.
- 473 Boutzis, E. I., Zhang, J., and Moran, M. D.: Expansion of a size disaggregation profile library for particulate matter emissions  
 474 processing from three generic profiles to 36 source-type-specific profiles, *J Air Waste Manag Assoc.*, 70, 1067–1100,  
 475 <https://doi.org/10.1080/10962247.2020.1743794>, 2020.
- 476 Briggs, G. A.: Plume rise and buoyancy effects, in: *Atmospheric Sciences and Power Production*, DOE/TIC-27601 (DE84005177),  
 477 edited by D. Randerson, Technical Information Center, U.S Department of Energy, Oak Ridge, Tennessee, 327–366, 1984.
- 478 Charnock, H.: Wind stress on a water surface, *Q. J. R. Meteorol. Soc.*, 81, 639–640, <https://doi.org/10.1002/qj.49708135027>, 1955.

479 Charron, M., Manzini, E., and Warner, C. D.: Intercomparison of gravity wave parameterizations: Hines Doppler-spread and  
480 Warner and McIntyre ultra-simple schemes., *J. Meteorol. Soc. Jpn. Ser II*, 80, 335–345, <https://doi.org/10.2151/jmsj.80.335>, 2002.

481 Chen, J. and Menelaou, K.: Regional Air Quality Deterministic Prediction System with near-real-time wildfire emissions  
482 (RAQDPSFW): Upgrade to version 023, Technical note, November, Canadian Centre for Meteorological and Environmental  
483 Prediction, Montreal, 31 pp.,  
484 [https://collaboration.cmc.ec.gc.ca/cmc/CMOI/product\\_guide/docs/tech\\_notes/technote\\_raqdpsfw\\_e.pdf](https://collaboration.cmc.ec.gc.ca/cmc/CMOI/product_guide/docs/tech_notes/technote_raqdpsfw_e.pdf), 2021.

485 Chen, J., Moran, M. D., Pavlovic, R., and Munoz-Alpizar, R.: RAQDPS-FireWork v20.2 (RAQDPS020.2FW): Operational  
486 version of the Regional Air Quality Deterministic Prediction System with near-real-time wildfire emissions from the Canadian  
487 Forest Fire Emission Prediction System (CFFEPS), Technical note, April, Canadian Centre for Meteorological and Environmental  
488 Prediction, Montreal, 14 pp.,  
489 [https://collaboration.cmc.ec.gc.ca/cmc/cmoe/product\\_guide/docs/tech\\_notes/technote\\_raqdps020.2fw\\_20190415\\_e.pdf](https://collaboration.cmc.ec.gc.ca/cmc/cmoe/product_guide/docs/tech_notes/technote_raqdps020.2fw_20190415_e.pdf), 2019a.

490 Chen, J., Anderson, K., Pavlovic, R., Moran, M. D., Englefield, P., Thompson, D. K., Munoz-Alpizar, R., and Landry, H.: The  
491 FireWork v2.0 air quality forecast system with biomass burning emissions from the Canadian Forest Fire Emissions Prediction  
492 System v2.03, *Geosci. Model Dev.*, 12, 3283–3310, <https://doi.org/10.5194/gmd-12-3283-2019>, 2019b.

493 CMC-GDPS-8.0.0: Changes to the Global Deterministic Prediction System from version 7.1.0 to version 8.0.0, Technical note,  
494 December, Canadian Centre for Meteorological and Environmental Prediction, Montreal, 112 pp.,  
495 [http://collaboration.cmc.ec.gc.ca/cmc/cmoe/product\\_guide/docs/tech\\_notes/technote\\_gdps-800\\_e.pdf](http://collaboration.cmc.ec.gc.ca/cmc/cmoe/product_guide/docs/tech_notes/technote_gdps-800_e.pdf), 2021a.

496 CMC-GDPS-8.0.0: The Global Deterministic Prediction System (GDPS) version 8.0.0 of the Meteorological Service (MSC) of  
497 Canada: Technical specifications document, December, Canadian Centre for Meteorological and Environmental Prediction,  
498 Montreal, 14 pp.,  
499 [https://collaboration.cmc.ec.gc.ca/cmc/cmoe/product\\_guide/docs/tech\\_specifications/tech\\_specifications\\_GDPS\\_8.0.0\\_e.pdf](https://collaboration.cmc.ec.gc.ca/cmc/cmoe/product_guide/docs/tech_specifications/tech_specifications_GDPS_8.0.0_e.pdf),  
500 2021b.

501 CMC-RAQDPS-023: The Regional Air Quality Deterministic Prediction System (RAQDPS) version 023 and the Regional Air  
502 Quality Deterministic Prediction System with Near-Real-Time Wildfire Emissions (RAQDPSFW) version 023 of the  
503 Meteorological Service of Canada (MSC): Technical Specifications Document, November, Canadian Centre for Meteorological  
504 and Environmental Prediction, Montreal, 19 pp.,  
505 [https://collaboration.cmc.ec.gc.ca/cmc/cmoe/product\\_guide/docs/tech\\_specifications/tech\\_specifications\\_RAQDPS\\_023\\_e.pdf](https://collaboration.cmc.ec.gc.ca/cmc/cmoe/product_guide/docs/tech_specifications/tech_specifications_RAQDPS_023_e.pdf),  
506 2021.

507 CMC-RDPS-8.0.0: Changes to the Regional Deterministic Prediction System (RDPS) from version 7.1.0 to version 8.0.0,  
508 Technical note, December, Canadian Centre for Meteorological and Environmental Prediction, Montreal, 36 pp.,  
509 [https://collaboration.cmc.ec.gc.ca/cmc/cmoe/product\\_guide/docs/tech\\_notes/technote\\_rdps-800\\_e.pdf](https://collaboration.cmc.ec.gc.ca/cmc/cmoe/product_guide/docs/tech_notes/technote_rdps-800_e.pdf), 2021a.

510 CMC-RDPS-8.0.0: The Regional Deterministic Prediction System (RDPS) version 8.0.0 of the Meteorological Service of Canada  
511 (MSC): Technical specifications document, December, Canadian Centre for Meteorological and Environmental Prediction,  
512 Montreal, 10 pp.,  
513 [https://collaboration.cmc.ec.gc.ca/cmc/cmoe/product\\_guide/docs/tech\\_specifications/tech\\_specifications\\_RDPS\\_8.0.0\\_e.pdf](https://collaboration.cmc.ec.gc.ca/cmc/cmoe/product_guide/docs/tech_specifications/tech_specifications_RDPS_8.0.0_e.pdf),  
514 2021b.

515 Côté, J., Gravel, S., Méthot, A., Patoine, A., Roch, M., and Staniforth, A.: The operational CMC–MRB Global Environmental  
516 Multiscale (GEM) model. Part I: Design considerations and formulation, *Mon. Weather Rev.*, 126, 1373–1395,  
517 [https://doi.org/10.1175/1520-0493\(1998\)126<1373:TOCMGE>2.0.CO;2](https://doi.org/10.1175/1520-0493(1998)126<1373:TOCMGE>2.0.CO;2), 1998.

518 Deacu, D., Fortin, V., Klyszejko, E., Spence, C., and Blanken, P. D.: Predicting the net basin supply to the Great Lakes with a  
519 hydrometeorological model, *J. Hydrometeorol.*, 13, 1739–1759, <https://doi.org/10.1175/JHM-D-11-0151.1>, 2012.

520 Delage, Y. and Girard, C.: Stability functions correct at the free convection limit and consistent for both the surface and Ekman  
521 layers, *Bound.-Layer Meteorol.*, 58, 19–31, <https://doi.org/10.1007/BF00120749>, 1992.

522 Dickson, R. J. and Oliver, W. R.: Emissions models for regional air quality studies, *Environ. Sci. Technol.*, 25, 1533–1535,  
523 <https://doi.org/10.1021/es00021a003>, 1991.

524 ECCC: Manual for the compilation of Canada’s air pollutant emissions, Environment Canada, Gatineau, Québec, 41 pp.,  
525 [https://publications.gc.ca/collections/collection\\_2013/ec/En14-87-2013-eng.pdf](https://publications.gc.ca/collections/collection_2013/ec/En14-87-2013-eng.pdf), 2013.

- 526 ECCC: 1990–2015 Air Pollutant Emission Inventory Report, Environment and Climate Change Canada, Gatineau, Quebec, 97  
527 pp., [https://publications.gc.ca/collections/collection\\_2017/eccc/En81-26-2015-eng.pdf](https://publications.gc.ca/collections/collection_2017/eccc/En81-26-2015-eng.pdf), 2016.
- 528 ECCC: Canada’s Air Pollutant Emissions Inventory Report 1990–2018, Environment and Climate Change Canada, Gatineau,  
529 Quebec, 96 pp., [https://publications.gc.ca/collections/collection\\_2020/eccc/En81-30-2018-eng.pdf](https://publications.gc.ca/collections/collection_2020/eccc/En81-30-2018-eng.pdf), 2020.
- 530 Foken, T.: 50 Years of the Monin–Obukhov similarity theory, *Bound.-Layer Meteorol.*, 119, 431–447,  
531 <https://doi.org/10.1007/s10546-006-9048-6>, 2006.
- 532 Galmarini, S., Makar, P., Clifton, O. E., Hogrefe, C., Bash, J. O., Bellasio, R., Bianconi, R., Bieser, J., Butler, T., Ducker, J.,  
533 Flemming, J., Hodzic, A., Holmes, C. D., Kioutsioukis, I., Kranenburg, R., Lupascu, A., Perez-Camanyo, J. L., Pleim, J., Ryu, Y.-  
534 H., San Jose, R., Schwede, D., Silva, S., and Wolke, R.: Technical note: AQMEII4 Activity 1: evaluation of wet and dry deposition  
535 schemes as an integral part of regional-scale air quality models, *Atmospheric Chem. Phys.*, 21, 15663–15697,  
536 <https://doi.org/10.5194/acp-21-15663-2021>, 2021.
- 537 Girard, C., Plante, A., Desgagné, M., McTaggart-Cowan, R., Côté, J., Charron, M., Gravel, S., Lee, V., Patoine, A., Qaddouri, A.,  
538 Roch, M., Spacek, L., Tanguay, M., Vaillancourt, P. A., and Zadra, A.: Staggered vertical discretization of the Canadian  
539 Environmental Multiscale (GEM) model using a coordinate of the log-hydrostatic-pressure type, *Mon. Weather Rev.*, 142, 1183–  
540 1196, <https://doi.org/10.1175/MWR-D-13-00255.1>, 2014.
- 541 de Grandpré, J., Tanguay, M., Qaddouri, A., Zerroukat, M., and McLinden, C. A.: Semi-Lagrangian advection of stratospheric  
542 ozone on a Yin–Yang grid system, *Mon. Weather Rev.*, 144, 1035–1050, <https://doi.org/10.1175/MWR-D-15-0142.1>, 2016.
- 543 Hansen, A. B., Brandt, J., Christensen, J. H., and Kaas, E.: Semi-Lagrangian methods in air pollution models, *Geosci. Model Dev.*,  
544 4, 511–541, <https://doi.org/10.5194/gmd-4-511-2011>, 2011.
- 545 Hines, C. O.: Doppler-spread parameterization of gravity-wave momentum deposition in the middle atmosphere. Part 1: Basic  
546 formulation, *J. Atmospheric Sol.-Terr. Phys.*, 59, 371–386, [https://doi.org/10.1016/S1364-6826\(96\)00079-X](https://doi.org/10.1016/S1364-6826(96)00079-X), 1997a.
- 547 Hines, C. O.: Doppler-spread parameterization of gravity-wave momentum deposition in the middle atmosphere. Part 2: Broad  
548 and quasi monochromatic spectra, and implementation, *J. Atmospheric Sol.-Terr. Phys.*, 59, 387–400,  
549 [https://doi.org/10.1016/S1364-6826\(96\)00080-6](https://doi.org/10.1016/S1364-6826(96)00080-6), 1997b.
- 550 Houyoux, M. R., Vukovich, J. M., Coats, C. J., Wheeler, N. J. M., and Kasibhatla, P. S.: Emission inventory development and  
551 processing for the Seasonal Model for Regional Air Quality (SMRAQ) project, *J. Geophys. Res. Atmospheres*, 105, 9079–9090,  
552 <https://doi.org/10.1029/1999JD900975>, 2000.
- 553 Husain, S. Z. and Girard, C.: Impact of consistent semi-Lagrangian trajectory calculations on numerical weather prediction  
554 performance, *Mon. Weather Rev.*, 145, 4127–4150, <https://doi.org/10.1175/MWR-D-17-0138.1>, 2017.
- 555 Kain, J. S. and Fritsch, J. M.: A one-dimensional entraining/detraining plume model and its application in convective  
556 parameterization, *J. Atmospheric Sci.*, 47, 2784–2802, [https://doi.org/10.1175/1520-0469\(1990\)047<2784:AODEPM>2.0.CO;2](https://doi.org/10.1175/1520-0469(1990)047<2784:AODEPM>2.0.CO;2),  
557 1990.
- 558 Kain, J. S. and Fritsch, J. M.: The role of the convective ‘trigger’ function in numerical forecasts of mesoscale convective systems,  
559 *Meteorol. Atmospheric Phys.*, 49, 93–106, <https://doi.org/10.1007/BF01025402>, 1992.
- 560 Li, J. and Barker, H. W.: A radiation algorithm with correlated-k distribution. Part I: Local thermal equilibrium, *J. Atmospheric*  
561 *Sci.*, 62, 286–309, <https://doi.org/10.1175/JAS-3396.1>, 2005.
- 562 Lott, F. and Miller, M. J.: A new subgrid-scale orographic drag parametrization: Its formulation and testing, *Q. J. R. Meteorol.*  
563 *Soc.*, 123, 101–127, <https://doi.org/10.1002/qj.49712353704>, 1997.
- 564 Mailhot, J. and Bélair, S.: An examination of a unified cloudiness-turbulence scheme with various types of cloudy boundary layers,  
565 in: *Proc. 14th Symposium on Boundary Layer and Turbulence*, 7-11 August, Aspen, Colorado, American Meteorological Society,  
566 215–218, 2000.

567 Mailhot, J., Bélair, S., Lefavre, L., Bilodeau, B., Desgagné, M., Girard, C., Glazer, A., Leduc, A., Méthot, A., Patoine, A., Plante,  
568 A., Rahill, A., Robinson, T., Talbot, D., Tremblay, A., Vaillancourt, P., Zadra, A., and Qaddouri, A.: The 15-km version of the  
569 Canadian regional forecast system, *Atmosphere-Ocean*, 44, 133–149, <https://doi.org/10.3137/ao.440202>, 2006.

570 Matthias, V., Arndt, J. A., Aulinger, A., Bieser, J., Denier Van Der Gon, H., Kranenburg, R., Kuenen, J., Neumann, D., Pouliot,  
571 G., and Quante, M.: Modeling emissions for three-dimensional atmospheric chemistry transport models, *J. Air Waste Manag.*  
572 *Assoc.*, 68, 763–800, <https://doi.org/10.1080/10962247.2018.1424057>, 2018.

573 McFarlane, N. A.: The effect of orographically excited gravity wave drag on the general circulation of the lower stratosphere and  
574 troposphere, *J. Atmospheric Sci.*, 44, 1775–1800, [https://doi.org/10.1175/1520-0469\(1987\)044<1775:TEOOEG>2.0.CO;2](https://doi.org/10.1175/1520-0469(1987)044<1775:TEOOEG>2.0.CO;2), 1987.

575 McLinden, C. A., Olsen, S. C., Hannegan, B., Wild, O., Prather, M. J., and Sundet, J.: Stratospheric ozone in 3-D models: A simple  
576 chemistry and the cross-tropopause flux, *J. Geophys. Res. Atmospheres*, 105, 14653–14665,  
577 <https://doi.org/10.1029/2000JD900124>, 2000.

578 McTaggart-Cowan, R. and Zadra, A.: Representing Richardson Number hysteresis in the NWP boundary layer, *Mon. Weather*  
579 *Rev.*, 143, 1232–1258, <https://doi.org/10.1175/MWR-D-14-00179.1>, 2015.

580 McTaggart-Cowan, R., Vaillancourt, P. A., Zadra, A., Chamberland, S., Charron, M., Corvec, S., Milbrandt, J. A., Paquin-Ricard,  
581 D., Patoine, A., Roch, M., Separovic, L., and Yang, J.: Modernization of atmospheric physics parameterization in Canadian NWP,  
582 *J. Adv. Model. Earth Syst.*, 11, 3593–3635, <https://doi.org/10.1029/2019MS001781>, 2019a.

583 McTaggart-Cowan, R., Vaillancourt, P. A., Zadra, A., Separovic, L., Corvec, S., and Kirshbaum, D.: A Lagrangian perspective on  
584 parameterizing deep convection, *Mon. Weather Rev.*, 147, 4127–4149, <https://doi.org/10.1175/MWR-D-19-0164.1>, 2019b.

585 Moran, M. D., Dastoor, A., and Morneau, G.: Long-range transport of air pollutants and regional and global AQ modelling, in: *Air*  
586 *Quality Management -- Canadian Perspectives on a Global Issue*, E. Taylor and A. McMillan, Editors, Springer, Dordrecht,  
587 [https://link.springer.com/content/pdf/10.1007%2F978-94-007-7557-2\\_4](https://link.springer.com/content/pdf/10.1007%2F978-94-007-7557-2_4), 69–98, 2013.

588 Moran, M. D., Ménard, S., and Kornic, D.: Regional Air Quality Deterministic Prediction System (RAQDPS): Upgrade from  
589 version 022 to version 023, Technical note, December, Canadian Centre for Meteorological and Environmental Prediction,  
590 Montreal, 48 pp., [https://collaboration.cmc.ec.gc.ca/cmc/cmoei/product\\_guide/docs/lib/technote\\_raqdps023\\_20211130\\_e.pdf](https://collaboration.cmc.ec.gc.ca/cmc/cmoei/product_guide/docs/lib/technote_raqdps023_20211130_e.pdf),  
591 2021.

592 Noilhan, J. and Planton, S.: A simple parameterization of land surface processes for meteorological models, *Mon. Weather Rev.*,  
593 117, 536–549, [https://doi.org/10.1175/1520-0493\(1989\)117<0536:ASPOLS>2.0.CO;2](https://doi.org/10.1175/1520-0493(1989)117<0536:ASPOLS>2.0.CO;2), 1989.

594 Pace, T. G.: Methodology to estimate the transportable fraction (TF) of fugitive dust emissions for regional and urban scale air  
595 quality analyses (8/3/2005 Revision), U.S. Environmental Protection Agency, Research Triangle Park, North Carolina, 12 pp.,  
596 <https://www.nrc.gov/docs/ML1321/ML13213A386.pdf>, 2005.

597 Pudykiewicz, J., Benoit, R., and Mailhot, J.: Inclusion and verification of a predictive cloud-water scheme in a regional numerical  
598 weather prediction model, *Mon. Weather Rev.*, 120, 612–626, [https://doi.org/10.1175/1520-0493\(1992\)120<0612:IAVOAP>2.0.CO;2](https://doi.org/10.1175/1520-0493(1992)120<0612:IAVOAP>2.0.CO;2), 1992.

600 Reff, A., Bhawe, P. V., Simon, H., Pace, T. G., Pouliot, G. A., Mobley, J. D., and Houyoux, M.: Emissions inventory of PM<sub>2.5</sub> trace  
601 elements across the United States, *Environ. Sci. Technol.*, 43, 5790–5796, <https://doi.org/10.1021/es802930x>, 2009.

602 Ritchie, H., Bélair, S., Bernier, N. B., Buehner, M., Charron, M., Fortin, V., Garand, L., Houtekamer, P., Husain, S., Laroche, S.,  
603 Lemieux, J.-F., Lin, H., McTaggart-Cowan, R., Milbrandt, J., Mitchell, H., Pellerin, P., Pudykiewicz, J., Separovic, L., Smith, G.  
604 C., Tanguay, M., and Vaillancourt, P. A.: Recherche en Prévision Numérique contributions to numerical weather prediction,  
605 *Atmosphere-Ocean*, 60, 35–64, <https://doi.org/10.1080/07055900.2022.2038071>, 2022.

606 Robert, A.: A stable numerical integration scheme for the primitive meteorological equations, *Atmosphere-Ocean*, 19, 35–46,  
607 <https://doi.org/10.1080/07055900.1981.9649098>, 1981.

608 Sassi, M., Zhang, J., and Moran, M. D.: 2015 SMOKE-ready Canadian Air Pollutant Emission Inventory (APEI) package version  
609 1 [Data set], <http://doi.org/10.5281/zenodo.4883639>, 2021.

610 Seidel, D. J., Zhang, Y., Beljaars, A., Golaz, J.-C., Jacobson, A. R., and Medeiros, B.: Climatology of the planetary boundary layer  
611 over the continental United States and Europe, *J. Geophys. Res. Atmospheres*, 117, D17106,  
612 <https://doi.org/10.1029/2012JD018143>, 2012.

613 Siebesma, A. P. and Cuijpers, J. W. M.: Evaluation of parametric assumptions for shallow cumulus convection, *J. Atmospheric*  
614 *Sci.*, 52, 650–666, [https://doi.org/10.1175/1520-0469\(1995\)052<0650:EOPAFS>2.0.CO;2](https://doi.org/10.1175/1520-0469(1995)052<0650:EOPAFS>2.0.CO;2), 1995.

615 Siebesma, A. P., Bretherton, C. S., Brown, A., Chlond, A., Cuxart, J., Duynkerke, P. G., Jiang, H., Khairoutdinov, M., Lewellen,  
616 D., Moeng, C.-H., Sanchez, E., Stevens, B., and Stevens, D. E.: A large eddy simulation intercomparison study of shallow cumulus  
617 convection, *J. Atmospheric Sci.*, 60, 1201–1219, [https://doi.org/10.1175/1520-0469\(2003\)60<1201:ALESIS>2.0.CO;2](https://doi.org/10.1175/1520-0469(2003)60<1201:ALESIS>2.0.CO;2), 2003.

618 Simon, H., Beck, L., Bhave, P. V., Divita, F., Hsu, Y., Luecken, D., Mobley, J. D., Pouliot, G. A., Reff, A., Sarwar, G., and Strum,  
619 M.: The development and uses of EPA’s SPECIATE database, *Atmospheric Pollut. Res.*, 1, 196–206,  
620 <https://doi.org/10.5094/APR.2010.026>, 2010.

621 Sørensen, B., Kaas, E., and Korsholm, U. S.: A mass-conserving and multi-tracer efficient transport scheme in the online integrated  
622 Enviro-HIRLAM model, *Geosci. Model Dev.*, 6, 1029–1042, <https://doi.org/10.5194/gmd-6-1029-2013>, 2013.

623 Staniforth, A. and Côté, J.: Semi-Lagrangian integration schemes for atmospheric models—A review, *Mon. Weather Rev.*, 119,  
624 2206–2223, [https://doi.org/10.1175/1520-0493\(1991\)119<2206:SLISFA>2.0.CO;2](https://doi.org/10.1175/1520-0493(1991)119<2206:SLISFA>2.0.CO;2), 1991.

625 Stroud, C. A., Morneau, G., Makar, P. A., Moran, M. D., Gong, W., Pabla, B., Zhang, J., Bouchet, V. S., Fox, D., Venkatesh, S.,  
626 Wang, D., and Dann, T.: OH-reactivity of volatile organic compounds at urban and rural sites across Canada: Evaluation of air  
627 quality model predictions using speciated VOC measurements, *Atmos. Environ.*, 42, 7746–7756,  
628 <https://doi.org/10.1016/j.atmosenv.2008.05.054>, 2008.

629 Sundqvist, H., Berge, E., and Kristjánsson, J. E.: Condensation and cloud parameterization studies with a mesoscale numerical  
630 weather prediction model, *Mon. Weather Rev.*, 117, 1641–1657, [https://doi.org/10.1175/1520-0493\(1989\)117<1641:CACPSW>2.0.CO;2](https://doi.org/10.1175/1520-0493(1989)117<1641:CACPSW>2.0.CO;2), 1989.

632 Van Wagner, C. E.: Development and structure of the Canadian Forest Fire Weather Index System, Forestry Technical Report 35,  
633 Canadian Forestry Service, Ottawa, Ontario, 35 pp., <https://cfs.nrcan.gc.ca/publications?id=19927>, 1987.

634 Vosper, S. B., Wells, H., and Brown, A. R.: Accounting for non-uniform static stability in orographic drag parametrization: Non-  
635 uniform stability in orographic drag, *Q. J. R. Meteorol. Soc.*, 135, 815–822, <https://doi.org/10.1002/qj.407>, 2009.

636 Wells, H., Vosper, S. B., Ross, A. N., Brown, A. R., and Webster, S.: Wind direction effects on orographic drag, *Q. J. R. Meteorol.*  
637 *Soc.*, 134, 689–701, <https://doi.org/10.1002/qj.247>, 2008.

638 van de Wiel, B. J. H., Moene, A. F., Steeneveld, G. J., Hartogensis, O. K., and Holtslag, A. A. M.: Predicting the collapse of  
639 turbulence in stably stratified boundary layers, *Flow Turbul. Combust.*, 79, 251–274, <https://doi.org/10.1007/s10494-007-9094-2>,  
640 2007.

641 Zeng, X. and Beljaars, A.: A prognostic scheme of sea surface skin temperature for modeling and data assimilation: Sea surface  
642 skin temperature scheme, *Geophys. Res. Lett.*, 32, L14605, 4 pp., <https://doi.org/10.1029/2005GL023030>, 2005.

643 Zhang, J., Moran, M. D., Zheng, Q., Makar, P. A., Baratzadeh, P., Marson, G., Liu, P., and Li, S.-M.: Emissions preparation and  
644 analysis for multiscale air quality modeling over the Athabasca Oil Sands Region of Alberta, Canada, *Atmospheric Chem. Phys.*,  
645 18, 10459–10481, <https://doi.org/10.5194/acp-18-10459-2018>, 2018.

646 Zheng, W., Ek, M., Mitchell, K., Wei, H., and Meng, J.: Improving the stable surface layer in the NCEP Global Forecast System,  
647 *Mon. Weather Rev.*, 145, 3969–3987, <https://doi.org/10.1175/MWR-D-16-0438.1>, 2017.

648
